# Supplementary material for: Interferon β protects against lethal endotoxic and septic shock through SIRT1 upregulation
Source: PubMed Central journal article supplement (PMC3936230; doi:10.1038/srep04220), 2014-02-27
Supplement: srep04220-s1.pdf [file srep04220-s1.pdf]

## SUPPORTING MATERIAL

### Interferon $\beta$ protects against lethal endotoxic and septic shock through SIRT1 upregulation

Chae-Hwa Yoo<sup>\*, †</sup>, Ji-Hyun Yeom<sup>\*, †</sup>, Jin-Ju Heo<sup>\*</sup>, Eun-Kyung Song<sup>\*, †</sup>, Sang-Il Lee<sup>‡, †</sup>, and Myung-Kwan Han<sup>\*, §, †</sup>

<sup>\*</sup>Department of Microbiology, <sup>§</sup>Institute for Medical Science, Chonbuk National University Medical School, Jeonju 561-182, Republic of Korea

<sup>‡</sup>Department of Internal Medicine, Institute of Health Science, Gyeongsang National University College of Medicine, Jinju 660-702, Republic of Korea

<sup>†</sup>Both authors contributed equally to this work

<sup>†</sup>Correspondence: E.-K. Song, S.-I. Lee or M.-K. Han, Department of Microbiology, Chonbuk National University Medical School, Jeonju 561-182, Republic of Korea. E-mail: [silverysk@hanmail.net](mailto:silverysk@hanmail.net) (E.-K.S.), [goldgu@gnu.ac.kr](mailto:goldgu@gnu.ac.kr) (S.-I.L.) or [iamtom@chonbuk.ac.kr](mailto:iamtom@chonbuk.ac.kr) (M.-K.H.)

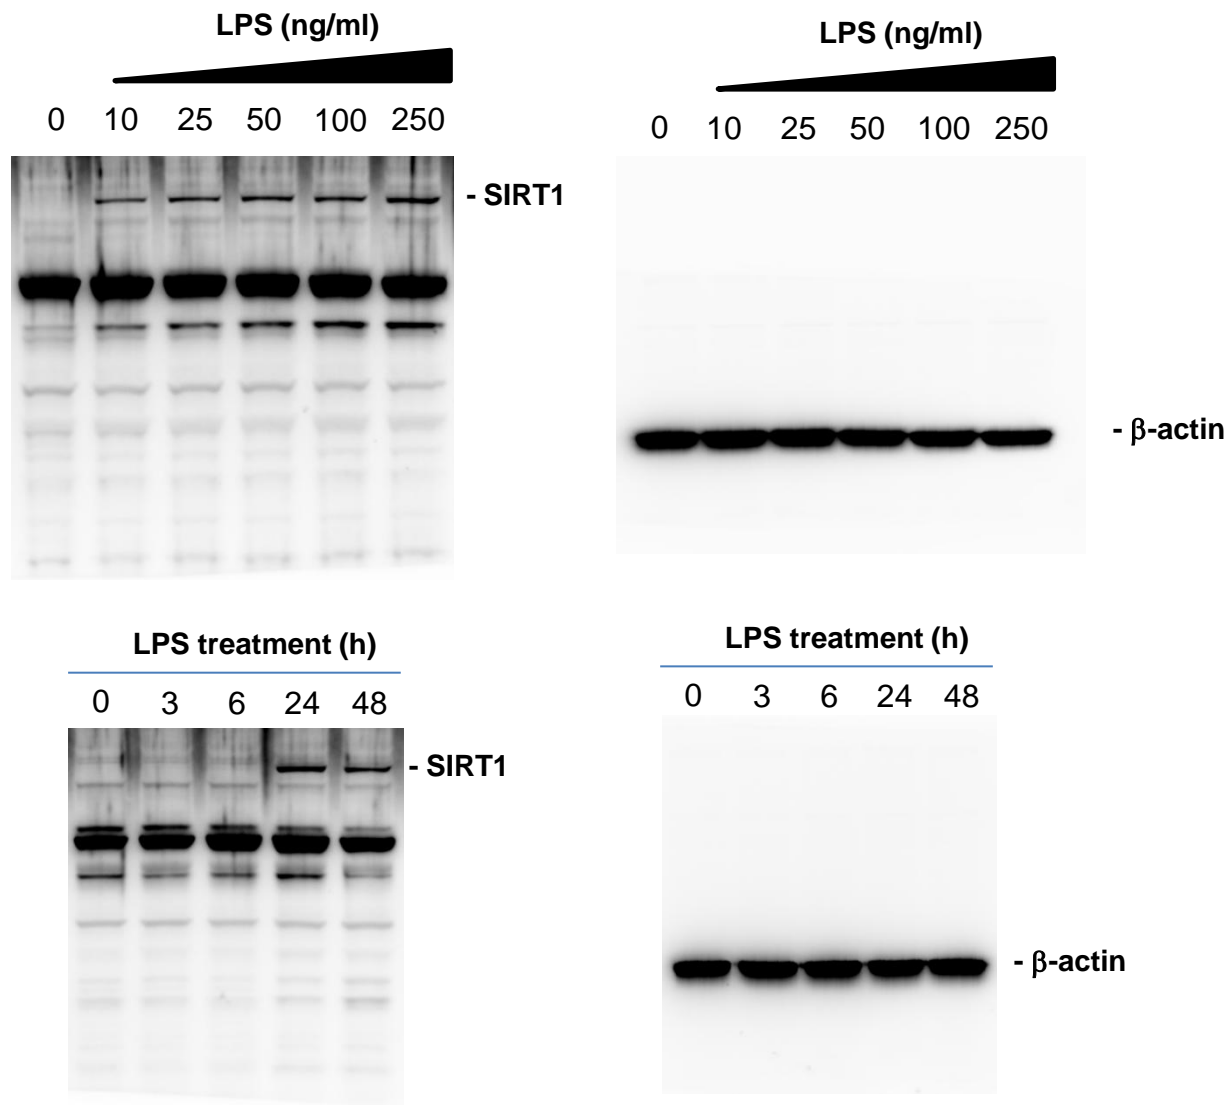

Supplementary Figure S1 Full-length blots for Figure 1B

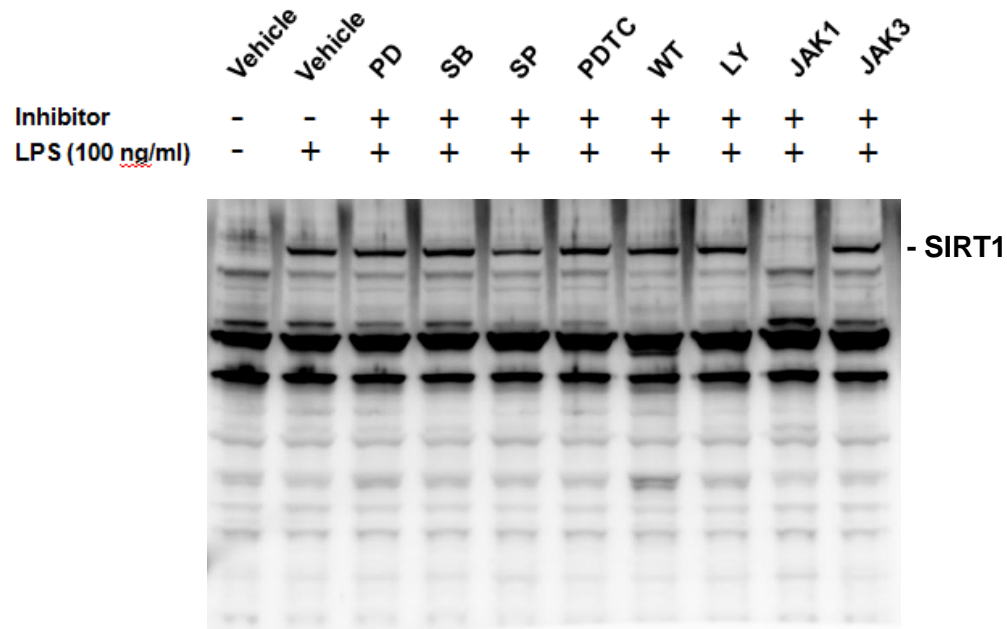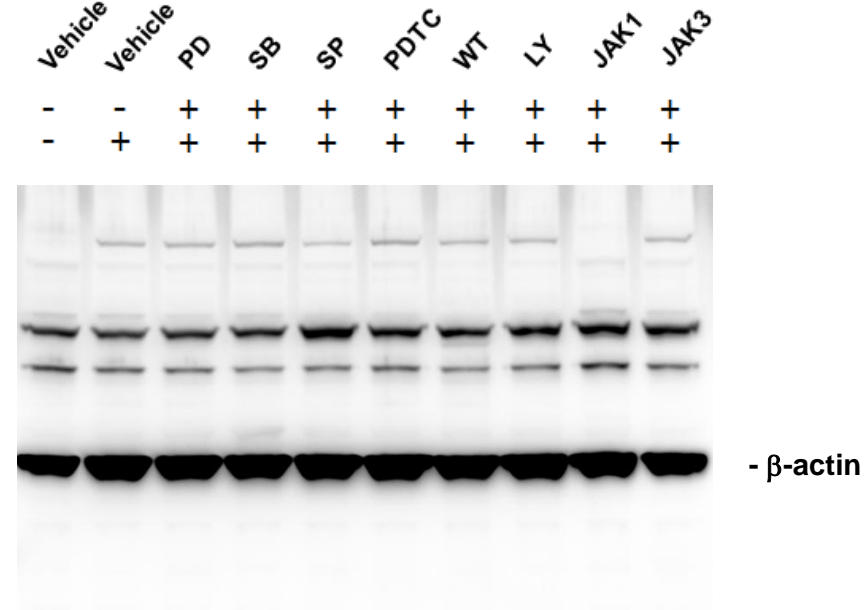

Supplementary Figure S2 Full-length blots for Figure 1D

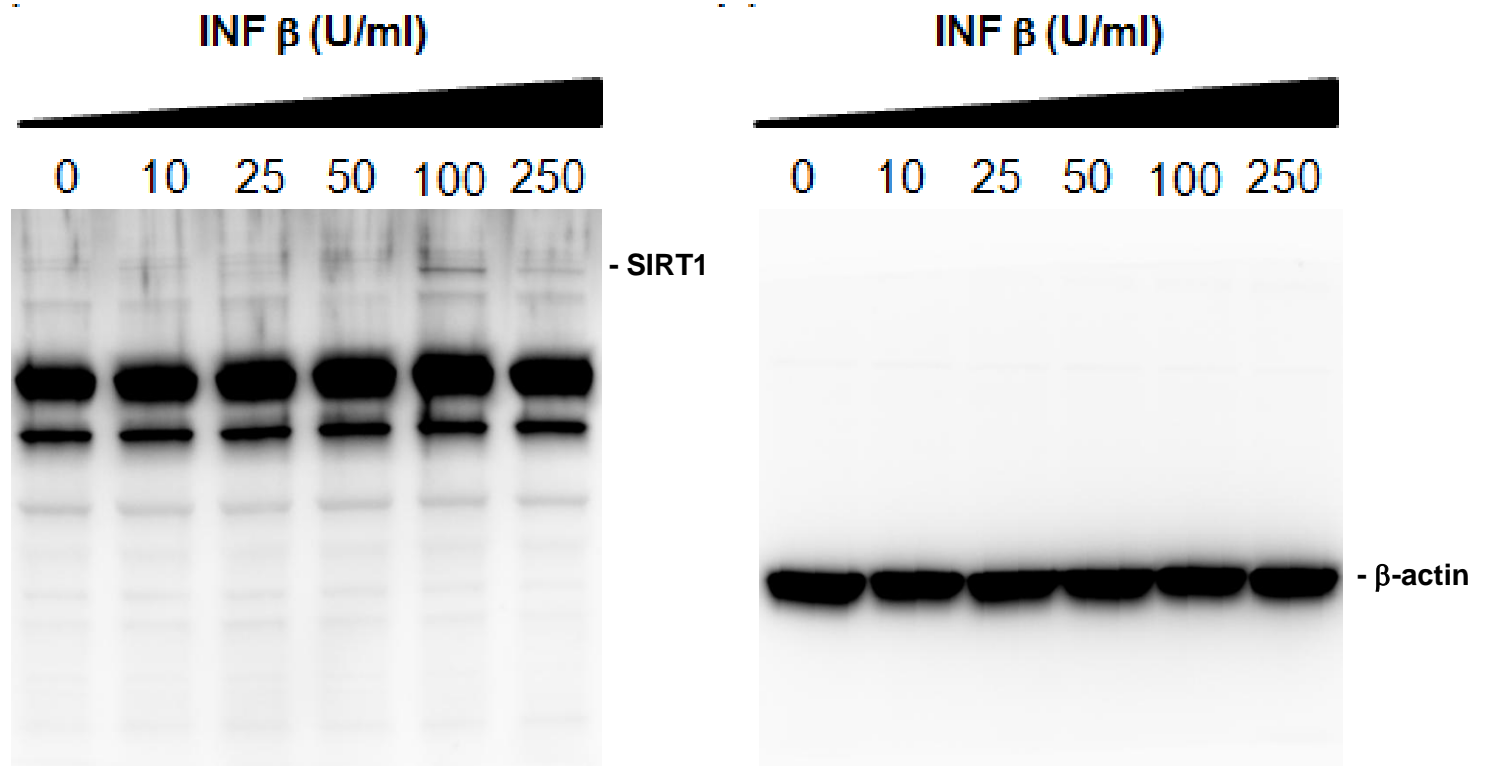

Supplementary Figure S3 Full-length blots for Figure 2A

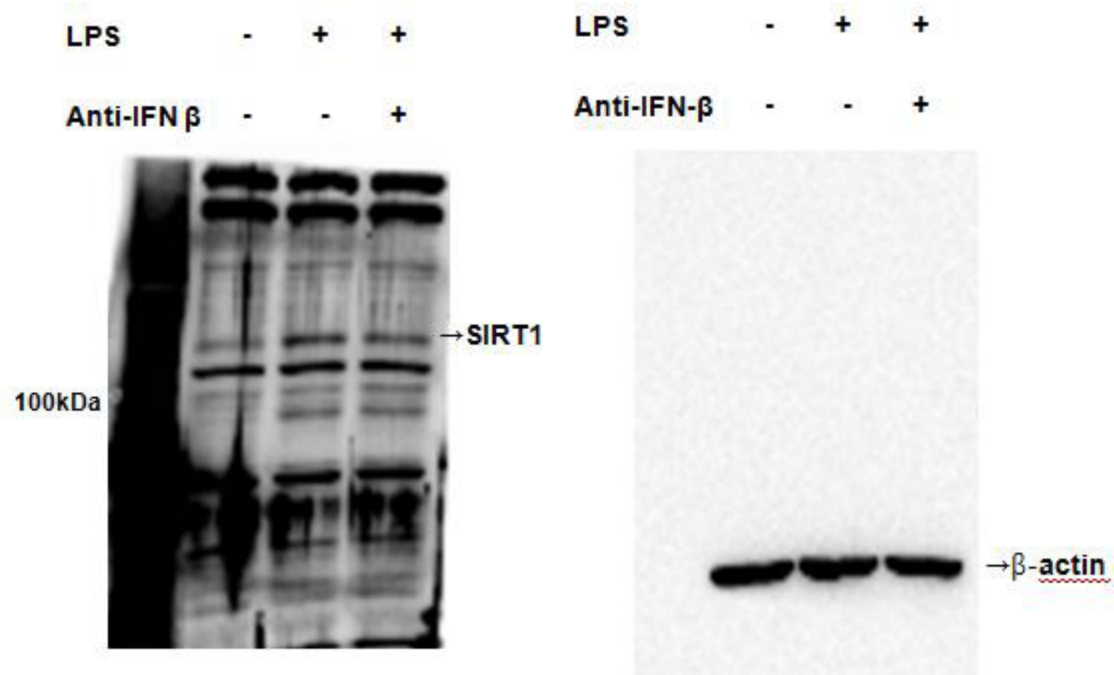

Supplementary Figure S4 Full-length blots for Figure 2B

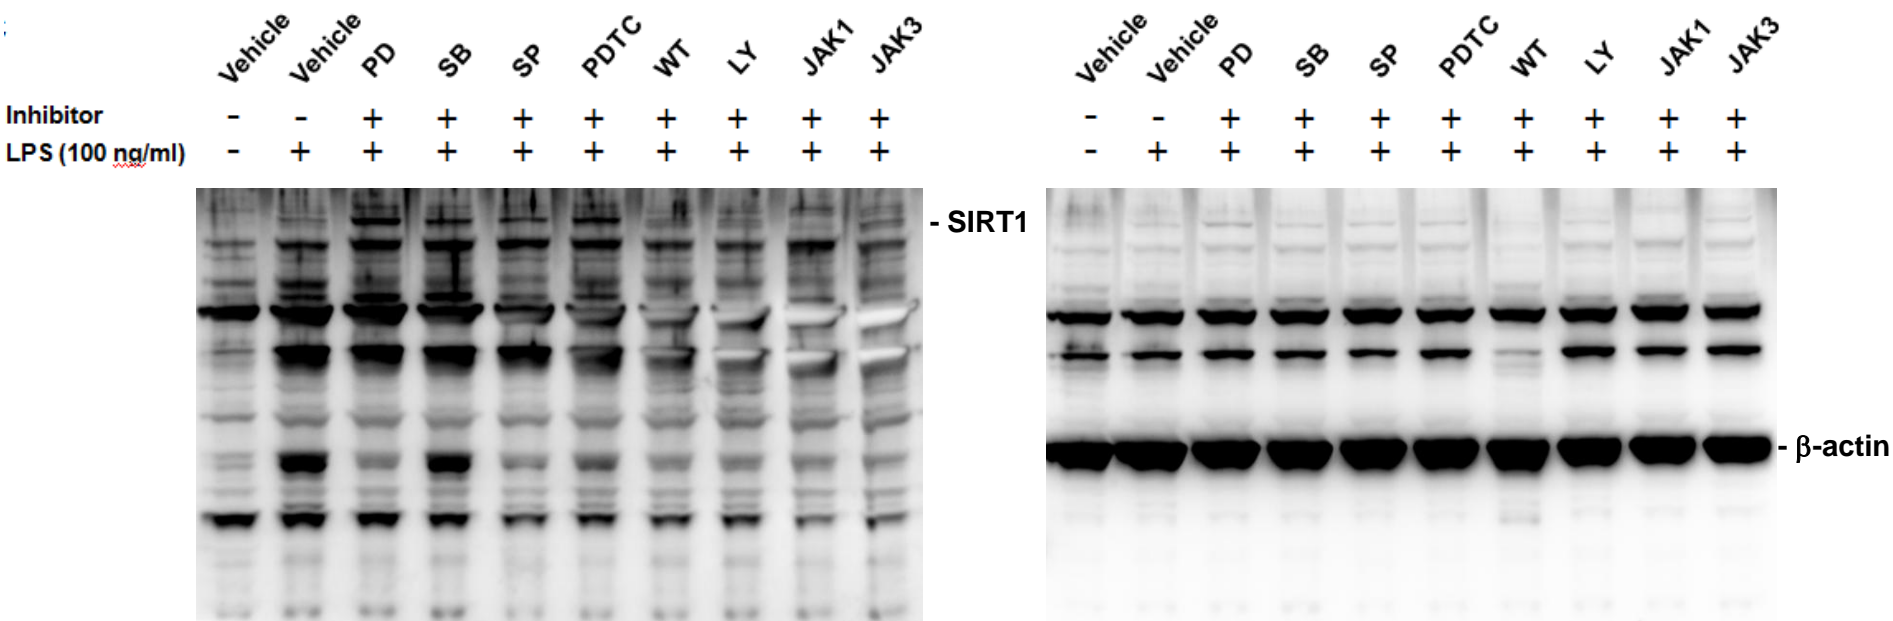

Supplementary Figure S5 Full-length blots for Figure 2C

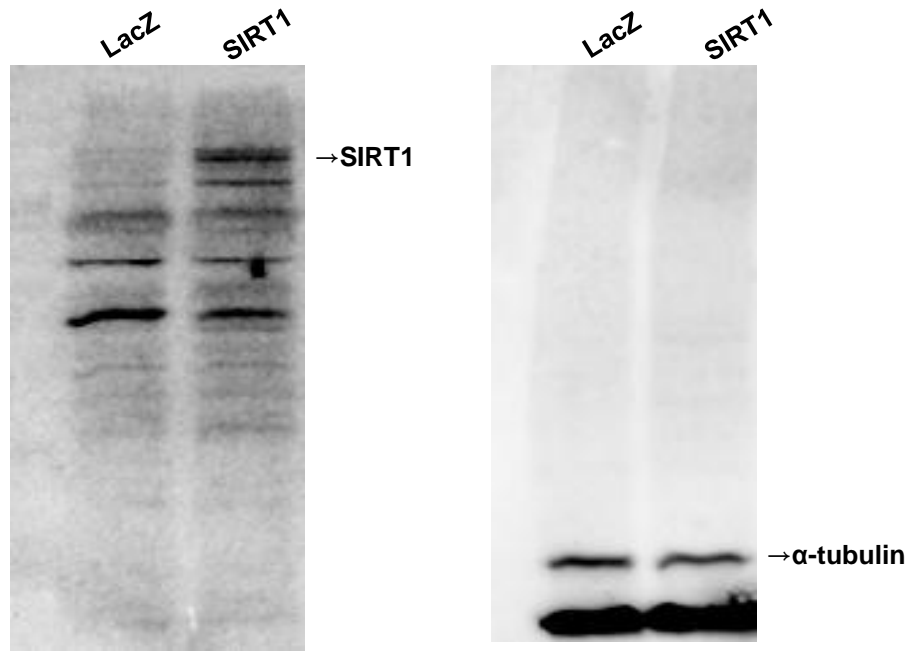

Supplementary Figure S6 Full-length blots for Figure 3A

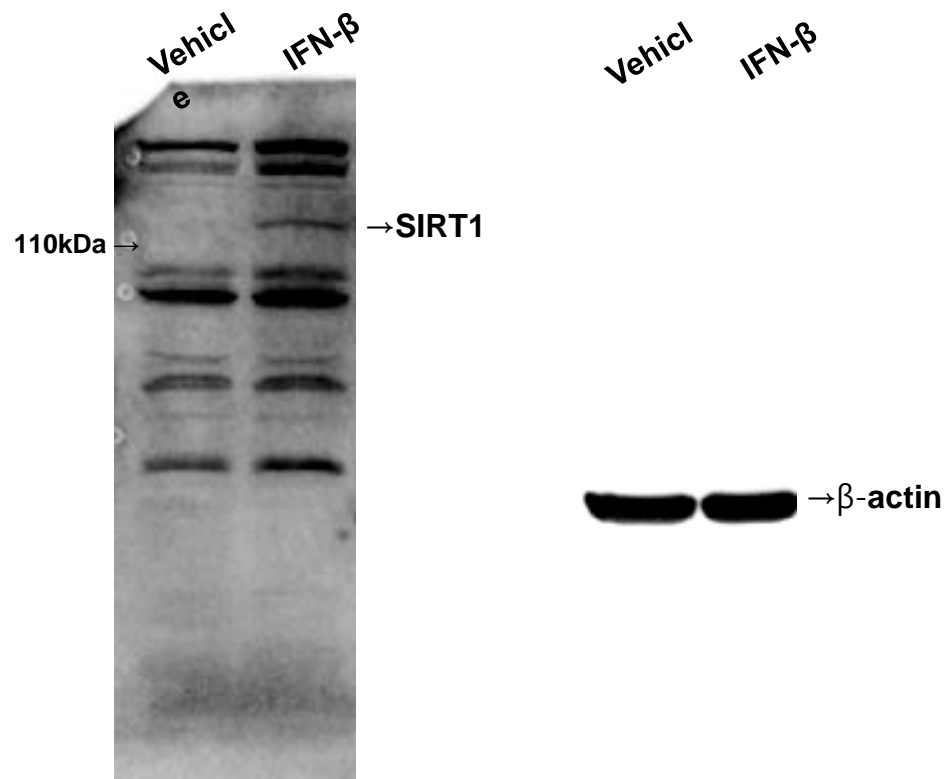

Supplementary Figure S7 Full-length blots for Figure 3B



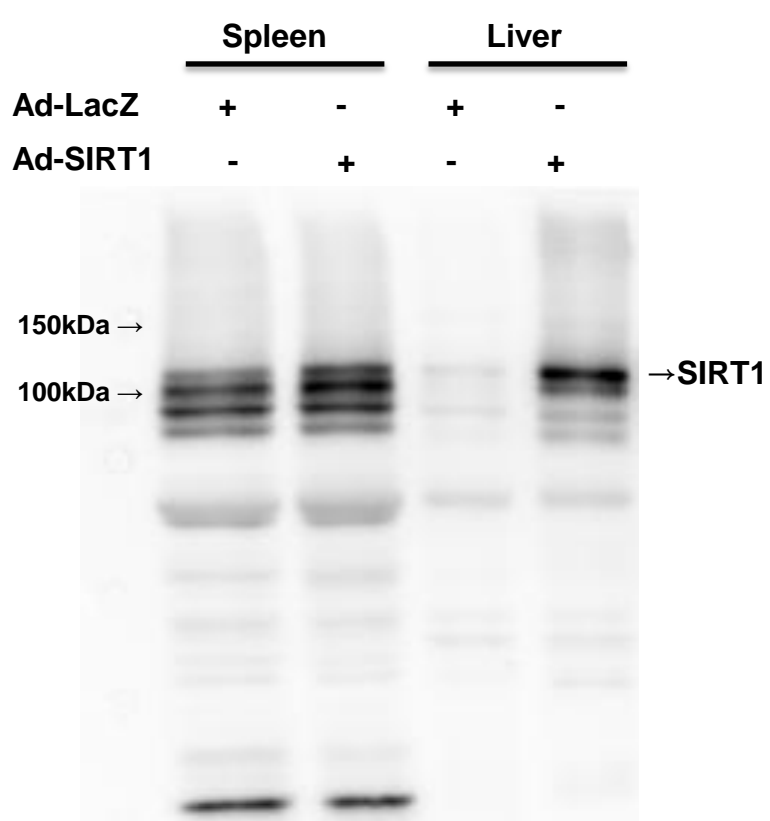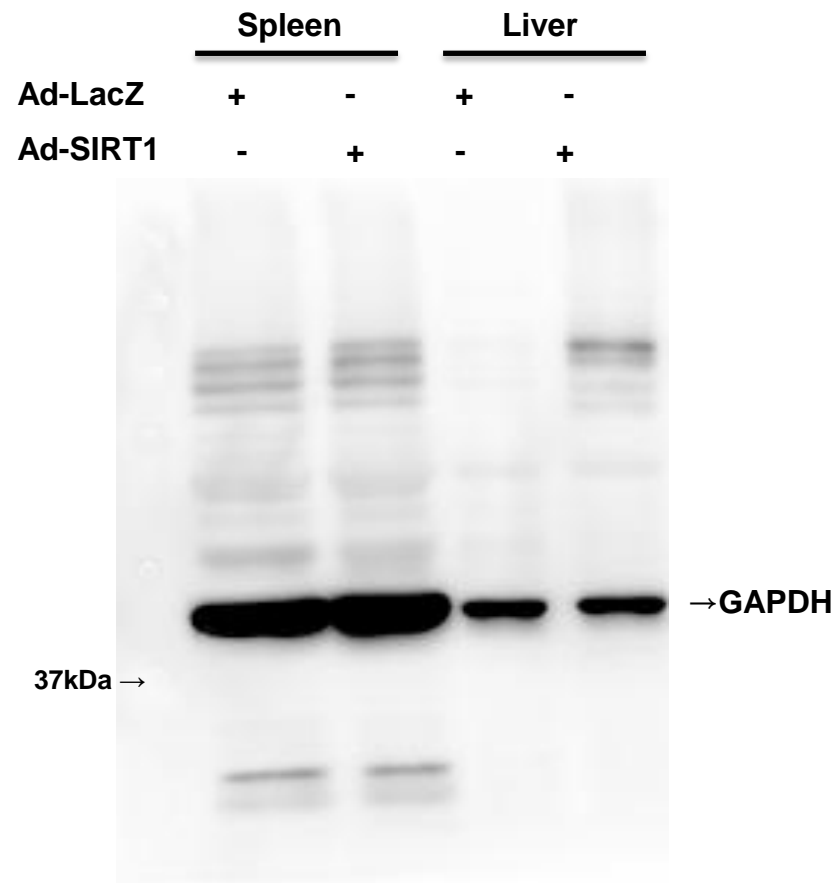

Supplementary Figure S8 Full-length blots for Figure 4A

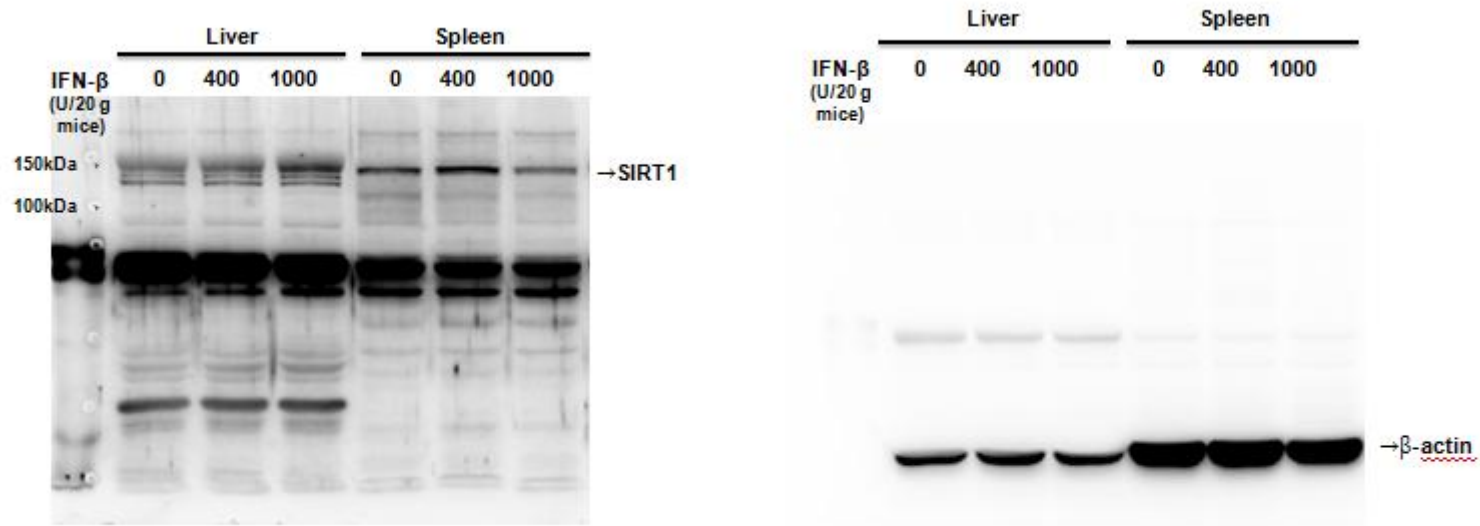

Supplementary Figure S9 Full-length blots for Figure 4B

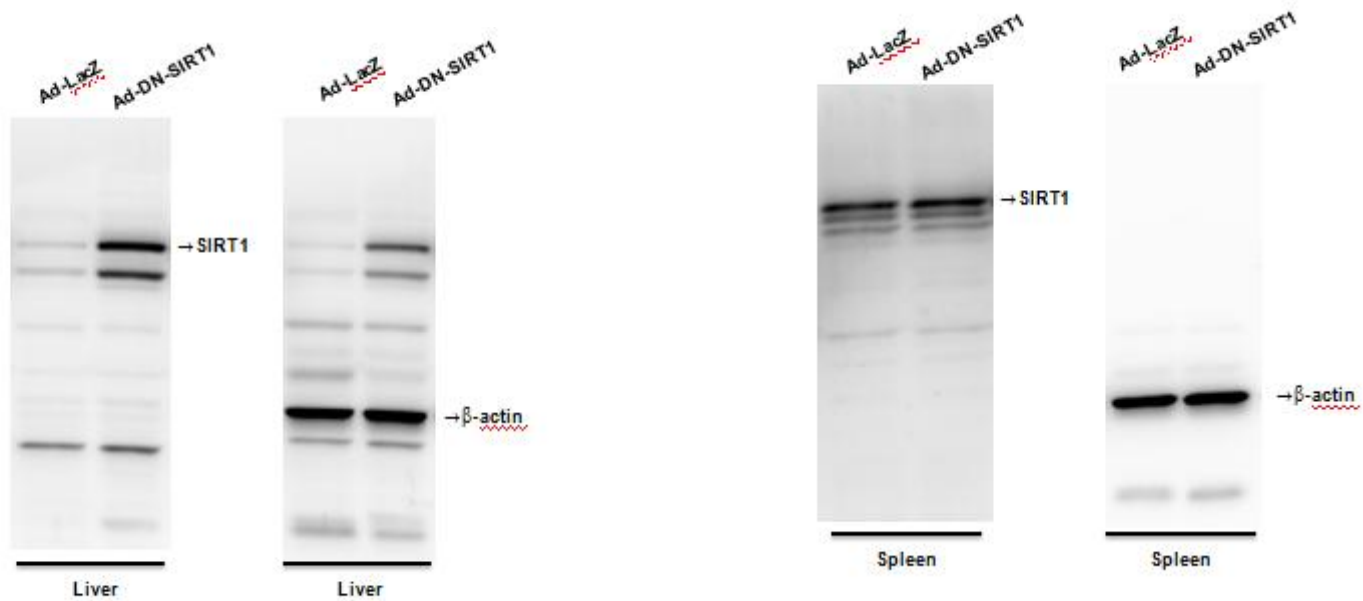

Supplementary Figure S10 Full-length blots for Figure 6
